# Supplementary material
Source: Springer Nature journal article supplement (https://www.springermedizin.de/resource/supplementary/13063_2013_1306_MOESM2_ESM.pdf/9619740)
Supplement: MOESM2 [file 9619740]

Subcutaneous injection of 2 ml blue dye into the upper inner arm along the medial intermuscular groove of the ipsilateral arm

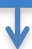

Massage of the site of injection and elevation for a few minutes

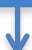

Covering of the patient with sterile drapes

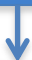

Start ALND by identifying ARM lymph nodes/lymphatics

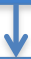

ARM-ALND

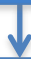

Standard ALND

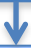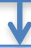

Separate analysis by the pathologist of all lymph nodes
